# Supplementary material for: Early lung ultrasonography predicts the occurrence of acute respiratory distress syndrome in blunt trauma patients
Source: Springer Nature journal article supplement (doi:10.1007/s00134-014-3382-9), 2014-07-14
Supplement: MOESM1 [file 8123324]

Table 1e – Patient Characteristics and Outcomes by ARDS Status

|  | ARDS  (n=19) | No ARDS  (n=22) | *p* |
| --- | --- | --- | --- |
| **Demographics** |  |  |  |
| Age (mean ± SD) | 36 ± 18 | 34 ± 14 | 0.58 |
| Men, n (%) | 13 (68) | 16 (73) | 0.97 |
| **Distribution of injuries** |  |  |  |
| Head trauma, n (%) | 11 (58) | 4 (18) | 0.01 |
| Chest trauma, n (%) | 16 (84) | 20 (91) | 0.65 |
| Abdominal trauma, n (%) | 7 (39%) | 13 (52%) | 0.40 |
| Spinal Fractures, n (%) | 6 (32) | 6 (27) | 0.97 |
| Long bone fractures, n (%) | 6 (32) | 5 (23) | 0.78 |
| **Injury severity measures** |  |  |  |
| Glasgow come scale (mean ± SD) | 10 ± 5 | 14 ± 2 | **< 0.01** |
| ISS (median; IQR) | 45[35-54] | 25[22-32] | **< 0.01** |
| AIS, chest (median; IQR) | 4[3-5] | 3[2-3] | **< 0.01** |
| Catecholamine on admission, n (%) | 9 (47) | 0 (0) | **<0.01** |
| Total loading at H24, ml (mean ± SD) | 5944 ± 2678 | 2961 ± 1509 | **< 0.01** |
| Patients requiring blood transfusion at H24, n (%) | 15 (79) | 3 (14) | **< 0.01** |
| **Physiologic parameters on admission** |  |  |  |
| SBP, mmHg (mean ± SD) | 118 ± 36 | 130 ± 20 | 0.17 |
| Heart rate, beats/min (mean ± SD) | 103 ± 26 | 85 ± 18 | **0.02** |
| Lactates, mmol/l (mean ± SD) | 2.5 ± 1.5 | 1.9 ± 1.1 | 0.19 |
| PaO2/FiO2, mmHg (mean ± SD) | 261 ± 141 | 364 ± 110 | 0.34 |
| PaCO2, mmHg (mean ± SD) | 49 ± 12 | 41 ± 6 | **0.02** |
| **Pulmonary status and outcomes** |  |  |  |
| Mechanical ventilation on admission, n (%) | 16 (84) | 2 (9) | **< 0.01** |
| Tidal Volume, ml/kg (mean ± SD) | 7.5 ± 1.1 | 7.7 ± 0.1 | 0.82 |
| LUS score of contusion size, n (median; IQR) | 7[4-9] | 2[1-4] | **< 0.01** |
| Mechanical ventilation in ICU, n (%) | 19 (100) | 6 (14) | **< 0.01** |
| Tidal Volume, ml/kg (mean ± SD) | 7.0 ± 1.5 | 7.7 ± 1.4 | 0.37 |
| Ventilator-free days by days 28, days (median; IQR) | 15[8-22] | 28[27-28] | **< 0.01** |
| **Patient outcomes** |  |  |  |
| Length of total ICU stay, days (median; IQR) | 13[5-17] | 1[1-2] | **<0.01** |
| Mortality, n (%) | 4 (21) | 0 (0) | **0.04** |
| ISS, injury severity score; AIS, abbreviated injury scale; SBP, systolic blood pressure; LUS, lung ultrasonography; ICU intensive care unit. | | | |

Table 2e - Sensitivity, Specificity, Likelihood Ratios and AUC-ROC of Each Diagnostic Method

|  | CE + CXR | Lung US |
| --- | --- | --- |
| **Pneumothorax (n=30)** |  |  |
| Sensitivity, % | 50 | 53 |
| Specificity, % | 92 | 95 |
| Positive likelihood ratio | 6.0 | 10.7 |
| Negative likelihood ratio | 0.5 | 0.5 |
| AUC-ROC, mean, [95% CI] | 0.74 [0.48-1] | 0.81 [0.50-1] |
| **Lung Contusion (n=60)** |  |  |
| Sensitivity, % | 78 | 90 |
| Specificity, % | 57 | 87 |
| Positive likelihood ratio | 1.8 | 6.8 |
| Negative likelihood ratio | 0.4 | 0.1 |
| AUC-ROC, mean, [95% CI] | 0.69 [0.47-0.92] | 0.88 [0.76-1] |
| **Hemothorax (n=25)** |  |  |
| Sensitivity, % | 52 | 60 |
| Specificity, % | 80 | 99 |
| Positive likelihood ratio | 2.6 | 39.0 |
| Negative likelihood ratio | 0.6 | 0.4 |
| AUC-ROC, mean, [95% CI] | 0.73 [0.51-0.94] | 0.84 [0.59-1] |
| AUC-ROC = area under the receiver operating characteristic curve; CE=clinical examination; CXR= chest radiograph. | | |
